# Supplementary material
Source: PubMed Central journal article supplement (PMC3413163)
Supplement: supp_139.17.3180_DEV084814FigS1A.pdf [file supp_139.17.3180_DEV084814FigS1A.pdf]

**A**

Sequence\_1: m5-10  
 Sequence\_2: m5-10\_del1361bp

**m5-10**



```

Seq_1 1  actagtggatccttgatagaggctgggatatgggcacacaaccattaggtttggaaagcaa 60
          |||
Seq_2 1  ACTAGTGGATCTTGATAGAGGCTGGGATATGGGCACACAACCATTAGGTTTGGAAAGCAA 60

Seq_1 61  gatttcattcatccttcacacctggaaccagttgctaagggccagaaaaccagggtcctc 120
          |||
Seq_2 61  GATTTCATTCATCCTTCATCCTGGAACCCAGTTGCTAAGGGCCAGAAAACCAGGGTCCTC 120

Seq_1 121  taccacttcgctggctgtcaatgggagaggaagagagaaaatcgggtacccaaagaagtc 180
          |||
Seq_2 121  TACCCACTTCGCTGGCTGTCAATGGGAGAGGAAGAGAGAAAATCGGGTACCCAAAGAAGTC 180

Seq_1 181  tgaacttttctcatggaggctgactctttggcaagtacctagcccaacagatctgcttga 240
          |||
Seq_2 181  TGAACTTTTCTCATGGAGGCTGACTCTTTGGCAAGTACCTAGCCCAACAGATCTGCTTGA 240

Seq_1 241  aagccttccccaggtccaacaatgaagaggccaatgatgaagggtgctcgggggtgggtgg 300
          |||
Seq_2 241  AAGCCTTCCCCAGGTCCAACAATGAAGAGGCCAATGATGAAGGTGCTCGGGGTGGGGTGG 300

Seq_1 301  ggggtggcgggactctgtagtcagagagcctgaccgggaccaggtcagtgacccccagg 360
          |||
Seq_2 301  GGGTGGCGGGACTCTGTAGTCAGAGAGCCTGACCGGGACCCAGGTCAGTGACCCCCAGG 360

Seq_1 361  ctcccccccccgccccagagaaactgcttccacaagcaaggacacatgtgactggt 420
          |||
Seq_2 361  CTCCCCCCCCGCCCCAGAGAAACTGCTTCCACAAGCAAGGGACACATGTGACTGTT 420

Seq_1 421  ttgctctggcagaactgtatggagctgaatgagccaggggactcacatcaaggcaacc 480
          |||
Seq_2 421  TTGCTCTGGCAGAACTGTATGGAGCTGAATGAGCCAGGGGACTCACATCAAGGCAACC 480

Seq_1 481  tggcgtgctgcaaaagtccattagctcttgaacctcaagtgtggcagattcatgagccta 540
          |||
Seq_2 481  TGGCGTGCTGCAAAAGTTCATTAGTCTTGAACCTCAAGTGTGGCAGATTTCATGAGCCTA 540

Seq_1 541  aaatatctgcgtgtgtgtgtgtgtgtgtgtgtgtgtgtgtgtgtgtgtgtgtgtgtgt 600
          |||
Seq_2 541  AAATATCTGCGTGTGTGTGTGTGTGTGTGTGTGTGTGTGTGTGTGTGTGTGTGTGTGT 600

Seq_1 601  gtgtgtgtgtgtatatacagacatcagctcttgagaaaacaagaatacaaaaataccgagaat 660
          |||
Seq_2 601  GTGTGTGTGTGTATACAGACATCAGTCTTGAGAAAACAAGAATACAAAAATACCGAGAAT 660

Seq_1 661  gggagttgggagttgggaatgtcaagtgcttagtgttctgttctcagcaacaaccgccc 720
          |||
Seq_2 661  GGGAGTTGGGAGTTGGGAATGTCAAGTGCTTAGTGTTCTGTCTCAGCAACAACCCGCC 720

Seq_1 721  cctcatgcttgaatctcagccctggagaggtagatgctggaggaacagacattcaaggt 780
          |||
Seq_2 721  CCTCATGCTTGTAATCTCAGCCCTGGAGAGGTAGATGCTGGAGGAACAGACATTCAAGGT 780

Seq_1 781  catcctgggcaaacacggggaactgagccagcctggtctacatgagaccatcttaaaaa 840
          |||
Seq_2 781  CATCTGGGCAAACACGGGGAACTGAGCCAGCCTGGTCTACATGAGACCCATCTTAAAAA 840

Seq_1 841  caaaacaaaaacaaaaacaaaaacaaaaacaaaaacaaaaacaaaaacaaaaacaaaa 900
          |||
Seq_2 841  CAAAACAAAACAAAACAAAACAAAACAAAACAAAACAAAACAAAACAAAACAAAACAAA 900
  
```

|       |      |                                                                |      |
|-------|------|----------------------------------------------------------------|------|
| Seq_1 | 901  | aaaaacaacaaccaaccaaccaacaacaacaacaacagAACAGAACAGAACAGAAAGGAAAA | 960  |
| Seq_2 | 901  | AAAAACAACAACCAACCAACCAACAACAACAACAACAGAACAGAACAGAAAGGAAAA      | 960  |
| Seq_1 | 961  | gaaaagAACAGATGAGACCTGGAGACATAGAAGATGCTACAGTCGCCCCACCCCCAC      | 1020 |
| Seq_2 | 961  | GAAAAGAACAGATGAGACCTGGAGACATAGAAGATGCTACAGTCGCCCCACCCCCAC      | 1020 |
| Seq_1 | 1021 | cccaccctacctgcctcaccaggctgagactagagaagctgggtaggccccacagatgg    | 1080 |
| Seq_2 | 1021 | CCCACCCCTACCTGCCTCACCAGGCTGAGACTAGAGAAGCTGGGTAGGCCCCACAGATGG   | 1080 |
| Seq_1 | 1081 | ctaggagatttGCTGAGGTTAGACGTCCATTCAGAGCGATTATCTACCTCCCTGGCCAG    | 1140 |
| Seq_2 | 1081 | CTAGGAGATTGCTGAGGTTAGACGTCCATTCAGAGCGATTATCTACCTCCCTGGCCAG     | 1140 |
| Seq_1 | 1141 | ttctgagagagttgggtacagccacagcatgtaacaaagctaccatccccgagctccaa    | 1200 |
| Seq_2 | 1141 | TTCTGAGAGAGTTGGGTACAGCCACAGCATGTAACAAAGCTACCATCCCGAGCTCCAA     | 1200 |
| Seq_1 | 1201 | ggccttgattggcagcagtggtctggacctctctcctatggccctcctgtctctctgg     | 1260 |
| Seq_2 | 1201 | GGCCTTGATTGGCAGCAGTGGTCTGGACCTCTCTCCTATGGCCCTCCTGTCTCTCTGG     | 1260 |
| Seq_1 | 1261 | gttgcttattaccaagctgggctgtcaatggtggaagggcactatctcattctttcccaa   | 1320 |
| Seq_2 | 1261 | GTTGCTTATTACCAAGCTGGGCTGTCAATGGTGAAGGGCCTATCTCATTCTTTCCCAA     | 1320 |
| Seq_1 | 1321 | agcttgcttcctctcacagggactcacaagacatttagcctggattgtccaccggccacc   | 1380 |
| Seq_2 | 1321 | AGCTTGCTTCCTCTCACAGGACTCACAAGACATTTAGCCTGGATTGTCCACCGGCCACC    | 1380 |
| Seq_1 | 1381 | gcatccccctccccccgagaagaacactctctctcctcaccctgaaattcaaggaag      | 1440 |
| Seq_2 | 1381 | GCATCCCCCTCCCCCCGAGAAGAACACTCTCTCTCCTCACCTGAAAAATCAAGGAAG      | 1440 |
| Seq_1 | 1441 | agctcaaccagaatattcctttaatgttttctctgtcacatccaacaccaaactctcttt   | 1500 |
| Seq_2 | 1441 | AGCTCAACCAGAATATTCCTTTAATGTTTTCTCTGTACATCCAACACCAAACACTCTCTTT  | 1500 |
| Seq_1 | 1501 | ggcctggttctcctaataatgagagaggtggtgtcagtttccattaatgtcaaagtgtctc  | 1560 |
| Seq_2 | 1501 | GGCCTGTTGTTCCTAAATGAGAGAGGTGGTGTGAGTTTCCATTAATGTCAAATGTCTCTC   | 1560 |
| Seq_1 | 1561 | ctttctgacttccctctcccgagaagaggtggctccaggccatggaaggaagggagggtt   | 1620 |
| Seq_2 | 1561 | CTTTCTGACTTCCTCTCCCAGAGAAGGTGGCTCCAGGCCATGGAAGGAAGGGAGGGTT     | 1620 |
| Seq_1 | 1621 | aagagtggaacatctaaagtcccagacctggctggttccaccaagggttaccactcaaaa   | 1680 |
| Seq_2 | 1621 | AAGAGTGAACATCTAAAGTCCAGACCTGGCTGGTTCCACCAAGGGTTACCACTCAAAA     | 1680 |
| Seq_1 | 1681 | gggtcccagtcaggctgatactaaatattcttttttctggctgaaactaagtagcaa      | 1740 |
| Seq_2 | 1681 | GGGTCCCAGTCAGGCTGATACTAAATATCATTTTTTTCTGGCTGAAACTAAGTAGCAA     | 1740 |
| Seq_1 | 1741 | ttttctcaaagccaagggtagcagtggaagcactctcaggcttcatactcagtggtcca    | 1800 |
| Seq_2 | 1741 | TTTTCTCAAAGCCAAGGGTACCAGTGAAGCACTCTCAGGCTTCCTACTTCACTCAGTGTTCA | 1800 |
| Seq_1 | 1801 | catctagacaccgagggatacaagactggactgccccctccatctccactgttgacagta   | 1860 |
| Seq_2 | 1801 | CATCTAGACACCAGGGATAACAAGACTGGACTGCCCCCTCCATCTCCACTGTTGACAGTA   | 1860 |

|       |      |                                                               |      |
|-------|------|---------------------------------------------------------------|------|
| Seq_1 | 1861 | ttatgggtggctccttggctcgctacagtgaccaggaaaccagagtccttcatgaaacaca | 1920 |
| Seq_2 | 1861 | TTATGGGTGGCTCCTTGGTCGCTACAGTGACCAGGAAACCCAGAGTCCTTCATGAAACACA | 1920 |
| Seq_1 | 1921 | gctctccccacccaaagcagtcagctacttccctaaccagggttcttctctgttgattg   | 1980 |
| Seq_2 | 1921 | GCTCTCCACCCAAAGCAGTCCAGTCTACTTCCTAACCCAGGGTCTTCCTGTTGTGATTG   | 1980 |
| Seq_1 | 1981 | ggacagaggggacaagctgtctctgcttccagagccttctatcagggtgggtgaggcagg  | 2040 |
| Seq_2 | 1981 | GGACAGAGGGACAAGCTGTCTCTGCTTCAGAGCCTTCTATCAGGGCTGGGTGAGGCAGG   | 2040 |
| Seq_1 | 2041 | aagggattgactgggggggggtgcagctagcagctgatggggaagaaaaattagaggtc   | 2100 |
| Seq_2 | 2041 | AAGGGATTGACTGGGGGGGGGTGCAGCTAGCAGCTGATGGGGAAGAAAAATTAGAGGTC   | 2100 |
| Seq_1 | 2101 | tcgaccaaacaattgtcttggctgactgatccttctacttggggttggctaccctcctca  | 2160 |
| Seq_2 | 2101 | TCGACCAAACAATTGTCTTGGTACTGATCCTTCTACTTGGGGTTGGCTACCCTCCTCA    | 2160 |
| Seq_1 | 2161 | ccctgccccgcacccccccccacctcccttcacctctctaaagtcattaccagagttt    | 2220 |
| Seq_2 | 2161 | CCCTGCCCCGCACCCCCCCCCACCTCCCTTCACCTCTCTAAAGTCATTACCAGAGTTT    | 2220 |
| Seq_1 | 2221 | tcacttacagctccaggcaggagtggcagctctcttttcttccctacctcctcagtgacc  | 2280 |
| Seq_2 | 2221 | TCACTTACAGCTCCAGGCAGGAGTGGCAGCTCTCTTTCTTCTACCTCCTCAGTGGACC    | 2280 |
| Seq_1 | 2281 | ccagctgagaaccttgtactccctgaggagaggaaagaaagctatcgagggccaccata   | 2340 |
| Seq_2 | 2281 | CCAGCTGAGAACCTTGTACTCCCTGAGGAGAGGAAAGAAAGCTATCGAGGGCCACCATA   | 2340 |
| Seq_1 | 2341 | ttatcctcaaggatcaggggtcctgcagtgtgtgataaactgatgttcttgaacaag     | 2400 |
| Seq_2 | 2341 | TTATCCTCAAGGATCAGGGTGCCTGCATGTGTGGATAAACTGATGTTCTTGAACAAG     | 2400 |
| Seq_1 | 2401 | tgtgtaggcccaagtttaaaagtctgatgtgatcttggaatttcctaaacctggagcga   | 2460 |
| Seq_2 | 2401 | TGTGTAGGCCCAAGTTTAAAAGTCTGATGTGATCTTGGTAATTTCCCTAAACCTGGAGCGA | 2460 |
| Seq_1 | 2461 | ccacactgccttggatatacagaagtaaccattcccaatttctccttggttccccggccc  | 2520 |
| Seq_2 | 2461 | CCACACTGCCCTGGTATACAGAAGTAACCATTCCCAATTTCTCCTTGTTCCTCCCGGCC   | 2520 |
| Seq_1 | 2521 | aaggtgaggtttcatctctcctccctaccctacccaccctgcacatgatgcagccct     | 2580 |
| Seq_2 | 2521 | AAGGTGAGGTTTCATCTCTCCTCCCTACCTACCCACCCCTGCATCTATGCATGGCCCT    | 2580 |
| Seq_1 | 2581 | ttatgaaacggcttggattctctctggtgtgatgcctctcttcttcagggcaggctggct  | 2640 |
| Seq_2 | 2581 | TTATGAAACGGCTTGGATTCTCTCTGGTGTGATGCCTCTCTTCTTCAGGGCAGGCTGGCT  | 2640 |
| Seq_1 | 2641 | ggaaaggccccggaggcctccagcattggatagaggtgcagtttcatctctggttttg    | 2700 |
| Seq_2 | 2641 | GGAAAGGCCCCCGGAGGCCTCCAGCATGGATAGAGGTGCAGTTTTCATCTCTGGTTTGG   | 2700 |
| Seq_1 | 2701 | aatctggccctttgagcaagcccagcacacacgtgtggatttaattttccttcttctt    | 2760 |
| Seq_2 | 2701 | AATCTGGCCCTTTGAGCAAGCCCAGCACACACGTGTGGATTTAATTTTCTTCTTCTT     | 2760 |
| Seq_1 | 2761 | gctttcttctccccccccaaagggaaacaagaaaaatagctttctgtgacagcgcga     | 2820 |
| Seq_2 | 2761 | GCTTCTTCTCCCCCCCCAAAGGGAACAAGAAAAATAGTCTTTCGTGTCGACAGCGCGA    | 2820 |

|       |      |                                                                |      |
|-------|------|----------------------------------------------------------------|------|
| Seq_1 | 2821 | caccattccttctgccaagaaaattgtcctttccagagccccagagaatagtgactc      | 2880 |
| Seq_2 | 2821 | CACCATTCTTCTGCAAAGAAAATTTGCTTTTCCAGAGCCCCAGAGAATAGTGACTC       | 2880 |
| Seq_1 | 2881 | ccaggtttccttagcacccttctgtcagggatgggggatccagataggtccctttacg     | 2940 |
| Seq_2 | 2881 | CCAGGTTTCCTTAGCACCTTCTGTGTCAGGGTATGGGGGATCCAGATAGGTCCCTTTACG   | 2940 |
| Seq_1 | 2941 | ttcaagggggaccccagccctagagttattagcctaggtctctgccaataaggtcaccac   | 3000 |
| Seq_2 | 2941 | TTCAAGGGGGACCCCAGCCCTAGAGTTATTAGCCTAGGTCTCTGCCAATAAGGTCACCAC   | 3000 |
| Seq_1 | 3001 | atacacacatthttgaggccactgatgggtgtagaagcaacatctacatccacagaactttc | 3060 |
| Seq_2 | 3001 | ATACACACATTTTGAGGCCACTGATGGTGTAGAAGCAACATCTACATCCACAGAACTTTC   | 3060 |
| Seq_1 | 3061 | atcgactttgggattgcagataggattcaaatcccctgggtcagtgacagacctgcagc    | 3120 |
| Seq_2 | 3061 | ATCGACTTTGGGATTGCAGATAGGATTCAAATCCCCTGGTTCAGTGCAGACCTGCAGC     | 3120 |
| Seq_1 | 3121 | ccgaggaggctccatgccatttcacttcagaccctcaccctttgggactgatgaccaccg   | 3180 |
| Seq_2 | 3121 | CCGAGGAGGCTCCATGCCATTTCACTTCAGACCCTCACCTTTGGGACTGATGACCACCG    | 3180 |
| Seq_1 | 3181 | aaattggggggggggcgggatttgacagcatgtcctttaccaccgagttctacagtca     | 3240 |
| Seq_2 | 3181 | AAATTGGGGGGGGGGCGGATTTGACAGCATGTCTTTACCACCGAGTTCTACAGTCA       | 3240 |
| Seq_1 | 3241 | cctaactgctactttgaggagtgaggactcctcgaacagcttgtgtctacagaacat      | 3300 |
| Seq_2 | 3241 | CCTAACTGCTACTTTGAGGGAGTGAGGACTCCTCGAACAGCTTGTGTCTACAGAAACAT    | 3300 |
| Seq_1 | 3301 | atccatgtcttatctccttgattgaaatacaaaaacacctgtccaccactcggtaag      | 3360 |
| Seq_2 | 3301 | ATCCATGTCTTATCTCCTTGATTGAAATACAAAACACCTGTCCACCCTCGGTAAG        | 3360 |
| Seq_1 | 3361 | agcaataatcataaccagaggatattagaagggtatattgaatattgaataattgcgaa    | 3420 |
| Seq_2 | 3361 | AGCAATAATCATAACCAGAGGGATATTAGAAGGTATATTGAATATTGAATAATTGCGAA    | 3420 |
| Seq_1 | 3421 | cctagtcaacactttccctgaaggccaaagctgagaggctggaagctgaataaaacatt    | 3480 |
| Seq_2 | 3421 | CCTAGTCAACACTTTCCCTGAAGGCCAAAGCTGAGAGGCTGGAAGCTGAATAAAACATT    | 3480 |
| Seq_1 | 3481 | ggaaagaaccttctgaaatcctgaaaaaaaacccacataataaagttagatttcact      | 3540 |
| Seq_2 | 3481 | GGAAAGAACCTTCTGAAATCCTGAAAAAAAACCCACATAATAAAGTCAGATTTCACT      | 3540 |
| Seq_1 | 3541 | gggcaagagggaaagtgcctcctgaggaaaaaaaaaaccaagaaaacaaaaaaccttc     | 3600 |
| Seq_2 | 3541 | GGGCAAGAGGGAAAGTGACCTCCTGAGGAAAAAAAAACCAAGAAAACAAAAAACCTTC     | 3600 |
| Seq_1 | 3601 | ccaccctccaaggagctctcctctgcaatctaagttggcacaagtttagttttctcgt     | 3660 |
| Seq_2 | 3601 | CCACCCTCCAAGGAGTCTCCTCTGCAATCTAAGTTGGCCAAGTTTAGTTTCTCTCGT      | 3660 |
| Seq_1 | 3661 | catttctattgtcattagaattcttattagttttccaggcctgtgtgctctcctctcta    | 3720 |
| Seq_2 | 3661 | CATTTCTATTGTCATTAGAATTTTATTAGTTTCCAGGCTGTGTGCTCTCCTCTCTA       | 3720 |
| Seq_1 | 3721 | ctttctgaccccagaggagacccaaaggaggcaggacaggccattggggaggatact      | 3780 |
| Seq_2 | 3721 | CTTCTGACCCCAGAGGAGACCCAAAGGAGGCAGGGACAGGCCATTGGGGAGGATACT      | 3780 |

|       |      |                                                                 |      |
|-------|------|-----------------------------------------------------------------|------|
| Seq_1 | 3781 | gaactaagtctgtggtcccgctgttctctttgctttactctaaaattaaggggaaat       | 3840 |
| Seq_2 | 3781 | GAACTAAGTCTGTGTTCCCGCTGTTCTCTTTGCTTTACTCTAAAAATAAGGGGAAAT       | 3840 |
| Seq_1 | 3841 | gtaaggaatagcaataatacgaatacgaataatagcaatagtaataatacaataacagc     | 3900 |
| Seq_2 | 3841 | GTAAGGAATAGCAATAATACGAATACTAATAATAGCAATAGTAATAATACAAATAACAGC    | 3900 |
| Seq_1 | 3901 | aatggctcattacgTTTTGTTTTGTTTTAATAAGAATTCCGGGTCTTCCTATCTTTCGAGG   | 3960 |
| Seq_2 | 3901 | AATGGCTCATTACGTTTTGTTTTGTTTTAATAAGAATTCCGGGTCTTCCTATCTTTCGAGG   | 3960 |
| Seq_1 | 3961 | tatttaagatcaaggcggaaatTTTGCAAAAGGGGCAAGGAGTATGAGAAAACCAGC       | 4020 |
| Seq_2 | 3961 | TATTTAAGATCAAGGCGAAATTTGCAAAAGGGGCAAGGAGTATGAGAAAACCAGC         | 4020 |
| Seq_1 | 4021 | ggggagcagggttaggaaagcgaactcttgaaagaaggaaggtgccaggcgtgtatgt      | 4080 |
| Seq_2 | 4021 | GGGGAGCAGGGTTAGGAAAGCGCAACTCTTGAAAGAAGGAAGGTGCCAGGCGTGTATGT     | 4080 |
| Seq_1 | 4081 | tgctgcccctctcccgcacagaggatgagggtgaagcggacaaggagacgctgaggctgca   | 4140 |
| Seq_2 | 4081 | TGCTGCCCTCTCCCGCACAGAGGATGAGGTTGAAGCGGACAAGGAGACGCTGAGGCTGCA    | 4140 |
| Seq_1 | 4141 | gtctctcccggtggttgctttctccagagcacggggccagtctctgaagctgggctt       | 4200 |
| Seq_2 | 4141 | GTCTCTCCCGTGGTGGTTGCTTTCTCCAGAGCACGGGCCAGTCTCTGAAGCTGGGCTT      | 4200 |
| Seq_1 | 4201 | ggcccaggtagttgcacccgaaattgCGGAGCAATGGGGAAAGTGAAGGAACCTCGGCC     | 4260 |
| Seq_2 | 4201 | GGCCCAGGTAGTTGCACCCGAAATTCGGGAGCAATGGGGAAAGTGAAGGAACCTCGGCC     | 4260 |
| Seq_1 | 4261 | cactcgcggggcaccctcggctctgggtttcctgccccacctcggttctcctggctcacc    | 4320 |
| Seq_2 | 4261 | CACTCGCGGGGCACCCTCGGCTCTGGTTCCTGCCCCACCTCGGTTCTCCTGGTCAACC      | 4320 |
| Seq_1 | 4321 | tactcgaatacggggacaaggattctggattgattcttgggtgaaaacgtgaattggg      | 4380 |
| Seq_2 | 4321 | TACTCGAATACGGGGACAAGGATTCTGGATTGATTCTTGGGTGAAAACGTGAATTTGGG     | 4380 |
| Seq_1 | 4381 | gctcgttcgcctgggaaacgaaagcaaaagctggagcaccagggcggcagcctggactct    | 4440 |
| Seq_2 | 4381 | GCTCGTTCGCCTGGGAAACGAAAGCAAAAGCTGGAGCACCAGGCCGGGCAGCCTGGACTCT   | 4440 |
| Seq_1 | 4441 | tggggaagagaacagggatgcacgctggtgtcctgcatctgtgctgcaggctgctgcccc    | 4500 |
| Seq_2 | 4441 | TGGGGAAGAGAACAGGGATGCACGCTGGTGTCTTGCATCTGTGCTGCAGGCTGCTGCCCC    | 4500 |
| Seq_1 | 4501 | gctgtcccttggggcctgaccttggctctaccgctgcagggccgcccgtgctactgccgc    | 4560 |
| Seq_2 | 4501 | GCTGTCCCTTGGGGCCTGACCTTGGCTCTACCGCTGCAGGGCCGCCCGTGTACTGCCGC     | 4560 |
| Seq_1 | 4561 | tccaatcctcgggtggaactgacgaccagaaccgggtcatgcttctgggaatcctaaagtTTC | 4620 |
| Seq_2 | 4561 | TCCAATCCTCGGTGGACTGCGACCAGAACC GGTCATGCTTCTGGGAATCCTAAAGTTTC    | 4620 |
| Seq_1 | 4621 | agggatcgcaaaacccaggacaagttcagatggaatgtctggctctcctggggcccgc      | 4680 |
| Seq_2 | 4621 | AGGGATCGCAAAACCCAGGACAAGTTCAGATGGAATGTCTGGCTCTCCTGGGGCCCGCA     | 4680 |
| Seq_1 | 4681 | acgCGGGGgtggggTGGGGCGGGGAGGAGAACTTACCCTCGGGAAGGCTGACGC          | 4740 |
| Seq_2 | 4681 | ACGCGGGGTTGGGGTGGGGCGGGGAGGAGAACTTACCCTCGGGAAGGCTGACGC          | 4740 |

|       |      |                                                               |      |
|-------|------|---------------------------------------------------------------|------|
| Seq_1 | 4741 | tcgcttgctccggtgtagggcaggcctagcttattgcccggagccgctggggtgggagaaa | 4800 |
| Seq_2 | 4741 | TCGCTTGCTCCGTGTAGGGCAGGCC TAGCTTATTGCCCGAGCCGCTGGGGTGGGAGAAA  | 4800 |
| Seq_1 | 4801 | gtctgtgcggttttcgtaactcaaacccaatggggtttccaaatgcgcgtagaagcttacg | 4860 |
| Seq_2 | 4801 | GTCTGTGCGGTTTCGTAAC TCAAACCCAATGGGTTTCCAAATGCGCGTAGAAGCTTACG  | 4860 |
| Seq_1 | 4861 | cagaccaccggacctctcagaaattatgccattgatccaactagaataattgccgat     | 4920 |
| Seq_2 | 4861 | CAGACCACCCGACCTCTCAGAAAT TATGCCATTGATCCAAC TAGAAATAATTGCCGAT  | 4920 |
| Seq_1 | 4921 | ttccacaaaacaaaatagagcgcctcgcccctctgcaggatccggcgctgaaaaaaaaat  | 4980 |
| Seq_2 | 4921 | TTCCACAAAACAAAATAGAGCGCCTCGCCCC TGCAGGATCCGGCGCTGAAAAAAAAAT   | 4980 |
| Seq_1 | 4981 | tccctctgcacagtgcaccgctctctacccttctcccacccggcccaccacacactcg    | 5040 |
| Seq_2 | 4981 | TCCCTCTGCACAGTGCACCCGCTCTTACCCCTTCTCCACCCGCCCCACCACACACTCG    | 5040 |
| Seq_1 | 5041 | caccccgccccgctctggccactctgggaccattgcatccccggatctcactgaaggag   | 5100 |
| Seq_2 | 5041 | CACCCCGCCCCGCTCTGGCCACTCTGGGACCCATTGCATCCCCGGATCTACTGAAGGAG   | 5100 |
| Seq_1 | 5101 | cggcagaccgaatggcctttctctctacaaggaaccttggcagacatctaagatatctaa  | 5160 |
| Seq_2 | 5101 | CGGCAGACCGAATGGCCTTTCTCTCTACAAGGAACCTTGGCAGACATCTAAGATATCTAA  | 5160 |
| Seq_1 | 5161 | tatccactaagatagcaaccagtacttatttcagcactgggcatgagatatggcacccca  | 5220 |
| Seq_2 | 5161 | TATCCACTAAGATAGCAACCAGTACTTATTT CAGCACTGGGCATGAGATATGGCACCCCA | 5220 |
| Seq_1 | 5221 | aatgtaaccagctaaaagggcctcctcgacagaaaaataaaaactgtgtaagtaagaagcc | 5280 |
| Seq_2 | 5221 | AATGTAACCAGCTAAAAGGGCCTCCTCGACAGAAAAATAAAACTGTGTAAGTAAGAAGCC  | 5280 |
| Seq_1 | 5281 | tttaccttttgcaacgaaccttaggaaccttgggttcttacaatgggagctaaagtg     | 5340 |
| Seq_2 | 5281 | TTTACCTTTTGCAACGAACCTTAGGAAACCTTGGTTTCCTTACAAATGGGAGCTAAAGTG  | 5340 |
| Seq_1 | 5341 | gtctcggctcctcacttctcttgatctctctaagagaatcgattttgcttctatttgctc  | 5400 |
| Seq_2 | 5341 | GTCTCGGCTCCTCACTTCTCTTGATCTCTCTAAGAGAATCGATTTTGCTTCTATTGTGTC  | 5400 |
| Seq_1 | 5401 | tcctgttcacactctctactccaggggctctgggtttatttatttctttatttccccca   | 5460 |
| Seq_2 | 5401 | TCCTGTTCACACTCTCTACTCCAGGGGCTCTGGGTTTATTTATTCTTTATTCCCCCA     | 5460 |
| Seq_1 | 5461 | aggccaggcacatgctggagttgtgtcttccagtagaccttgataaacgaagatggggaga | 5520 |
| Seq_2 | 5461 | AGGTCAGGCATGCTGGAGTTGTGTCTTCCAGTAGACCTTGATAAACGAAGATGGGGAGA   | 5520 |
| Seq_1 | 5521 | gaaccagcctccgcccactgcccggcactgccccagtcacgcgtgacaaggcgcggg     | 5580 |
| Seq_2 | 5521 | GAACCAGCCTCCCGCCACTGCCCGCCTGCCCCAGTCCAGCGTGACAAGGCGCGGG       | 5580 |
| Seq_1 | 5581 | ctgggtgctgacttgtgacgtctccacgccc aataggaccagcggtggtgagatagtc   | 5640 |
| Seq_2 | 5581 | CTGGTTGCGTGACTTGTGACGTCTCCACGCCCAATAGGACCAGCGGTGGTGAGATAGTC   | 5640 |
| Seq_1 | 5641 | gctatgcctgggtgctctttattttattggggtatgcctggcaataaacagtaatt      | 5700 |
| Seq_2 | 5641 | GCTATGCCTGGTTGCCTCTTTATTTTATTGGGATGCCTGGCAATAAACAGTAATT       | 5700 |

m5-5

0.8RV

|       |      |                                                                   |      |
|-------|------|-------------------------------------------------------------------|------|
| Seq_1 | 5701 | taatttgtcggagaccacaaaccaacggcgagctgggaggtacttgctttttcttgacaga     | 5760 |
| Seq_2 | 5701 | TAAATTTGTCGGAGACCACAAACCAACGGCGAGCTGGGAGGTACTTGC TTTTCTTGACAGA    | 5760 |
| Seq_1 | 5761 | ccctggaagaagtcttcgttttaaaggggggtgtctttgcgggggggggaggtgatg         | 5820 |
| Seq_2 | 5761 | CCCTGGAAGAAGTCTTCGTTTAAAGGGGGGTGTCTTTGCGGGGGGGGGGAGGTGATG         | 5820 |
| Seq_1 | 5821 | tcttttcaaaactcattgtgagctacctcgccctcagtgagcaaacccttttggtttttg      | 5880 |
| Seq_2 | 5821 | TCTTTTCAAAACTCATTGTGAGCTACCTCGCCTCAGTGAGCAAACCTTTTGGCTTTTGG       | 5880 |
| Seq_1 | 5881 | gctgaagaaaagagtgaggttattggaggtgagctcttgttgggggaaaactaaaggaggg     | 5940 |
| Seq_2 | 5881 | GCTGAAGAAAAGAGTGAGGTATTGGAGGTGAGTCTTGTGGGGGAAAAC TAAAGGGAGGG      | 5940 |
| Seq_1 | 5941 | 0.8RV acagatctctatcttcagggcggccttaattttcccagagcctctgcttcccaccctac | 6000 |
| Seq_2 | 5941 | ACAGATATCTATCTTCAGGGCGGCCTAATTTTCCCAGAGCCTCTGCTTCCACCTAC          | 6000 |
| Seq_1 | 6001 | ctaagcctggctgaacccttctgactggatttttatcttctatcacctggaagactgg        | 6060 |
| Seq_2 | 6001 | CTAAGCCTGGCTGAACCCCTCCTGACTGGATTTTATCTTCTATCACCTGGAAGACTGG        | 6060 |
| Seq_1 | 6061 | atctcgtgtgccagtttgtaagcaaaatacagaaaacaacattgagtgggtggctggcttc     | 6120 |
| Seq_2 | 6061 | ATCTCGTGTGCCAGTTTGTAAAGCAAAATACAGAAAACAACATTGAGTGGTGGCTGGCTTC     | 6120 |
| Seq_1 | 6121 | gtgcaccatctaagcccaaggaaggaagtgtttctggctgggttgttgcctggggaaggc      | 6180 |
| Seq_2 | 6121 | GTGCACCATCTAAGCCCAAGGAAGGAAGTGTCTTCTGGCTGGGTGTGCTTGGGGAAGGC       | 6180 |
| Seq_1 | 6181 | cagcttttccctctcgggaagggcctgctgattatattatggggattaattttatcctcaa     | 6240 |
| Seq_2 | 6181 | CAGCTTTTCCCTCTCGGGAAGGGCCTGCTGATTATTTATGGGGATTAATTTTATCCTCAA      | 6240 |
| Seq_1 | 6241 | atctctgtgaatgtaaaagggattggcgaggtctgtctgatttcccctatgcttcaacc       | 6300 |
| Seq_2 | 6241 | ATCTCTGTGAATGTAAAAGGGATTGGCGAGGTCTGTCTGGATTTCCCTATGCTTCAACC       | 6300 |
| Seq_1 | 6301 | agagatgcaggtctcaaccggcttccagcttccagtcctgcaccaaggttgaggttgc        | 6360 |
| Seq_2 | 6301 | AGAGATGCAGGCTCTCAACCGCTTTCAGCTTTCAGTCTGCACCCAAGGTTGAGGTTGC        | 6360 |
| Seq_1 | 6361 | ctctctgttcaaccccaaaggctttctagctgactttttagaagcgcgtgacgaaggtgt      | 6420 |
| Seq_2 | 6361 | CTCTCTGTTCAACCCCAAAGGCTTTCAGCTGACTTTTTAGAAAGCGGTGACGAAGGTGT       | 6420 |
| Seq_1 | 6421 | ttgcacaaataaatagctggccttgccagggtctgtgtgaaaacagacctggaaactag       | 6480 |
| Seq_2 | 6421 | TTGCACAAATAAATAGCTGGCCTTGCCAGGGTCTGTGTGAAAACAGACCTGGAAACTAG       | 6480 |
| Seq_1 | 6481 | agagtggggttgccctagctgccccacgcttacaactgcaaagtccactgaagttttt        | 6540 |
| Seq_2 | 6481 | AGAGTGGGGTTGCCCTAGCTGCCCCACGCTTACAAC TCAAAGTCCACTGAAGTTTTT        | 6540 |
| Seq_1 | 6541 | gcaagggcagcctgcaaattttgcagccacagaggctacaatgttgcggagtcctatgg       | 6600 |
| Seq_2 | 6541 | GCAAGGGCAGCCTGCAAATTTGTCAGCCACAGAGGCTACAATGTTGCCGGAGTCCTATGG      | 6600 |
| Seq_1 | 6601 | gctctctctctctctctctctctctctctctctctctctctctctctctctctctctctc      | 6660 |
| Seq_2 | 6601 | GCTCTCTCTCTCTCTCTCTCTCTCTCTCTCTCTCTCTCTCTCTCTCTCTCTCTCTCTCTC      | 6660 |

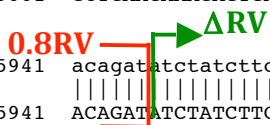

|       |      |                                                                 |      |
|-------|------|-----------------------------------------------------------------|------|
| Seq_1 | 6661 | tccagtccttggctctaaggatgtagtttctaattagagtc ccagaaaagactccctgta   | 6720 |
| Seq_2 | 6661 | TCCAGTCCTTGGCTCTAAGGATG TAGTTTCTAATTAGAGTCC CAGAAAAGACTCCCTGTA  | 6720 |
| Seq_1 | 6721 | cttagagaatacaaggaagctgaagagggaaacagaatgtgatttggggcatttgtttca    | 6780 |
| Seq_2 | 6721 | CTTAGAGAATACAAGGAAGCTGAAGAGGGAAACAGAATGTGATTGGGGCATTGTTTCA      | 6780 |
| Seq_1 | 6781 | agcaacattctgtgcttctcccggcctggttctgcttacagcaagagctacttccagtgc    | 6840 |
| Seq_2 | 6781 | AGCAACATTCTGTGCTTGTCCCGCCTGGTCTGCTTACAGCAAGAGCTACTTCCAGTGC      | 6840 |
| Seq_1 | 6841 | ctctgctgtgggctgcttttattcaccctctgaactgcagacttcagagaggctaagggc    | 6900 |
| Seq_2 | 6841 | CTCTGCTGTGGGCTGCTTTTATTACCCCTCTGAAC TGCAGACTTCAGAGAGGCTAAGGGC   | 6900 |
| Seq_1 | 6901 | aggccaaggagtgtgagcagctgaacccccagccagcctcagtgactgattattttaa      | 6960 |
| Seq_2 | 6901 | AGGCCAAGGAGTGTGGCAGCTGAAACCC CAGCCAGCCCTCAGTGACTGATTATTTTAA     | 6960 |
| Seq_1 | 6961 | taaaactgggcactgctctgtgtacactccagtgtgtgtcttgaggagggggcacacaca    | 7020 |
| Seq_2 | 6961 | TAAAAC TGGGC ACTGCTCTGTGTACACTCCAGTGTGTGCTTGAGGAGGGGGCACACACA   | 7020 |
| Seq_1 | 7021 | acaatttcttggcatctttgatcttgggtcccccacctaaggcaccttctcccccaagt     | 7080 |
| Seq_2 | 7021 | ACAATTTCTTGGCATCTTTGATCTTGGT TCCCCATCCTAAGGCACCTTCTCCCCAAGT     | 7080 |
| Seq_1 | 7081 | cctagagagccttgagtgaggtagggtagggtaggggacaatgagtctgaagtggaggagatg | 7140 |
| Seq_2 | 7081 | CCTAGAGAGCCTTGAGTGGGTAGGGTAGGGGACAATGAGTCTGAAGTGGAGGAGAGATG     | 7140 |
| Seq_1 | 7141 | tcaaggcagctagtcctggctctgcaaggggccaggcagggtcacaccactctctgtctg    | 7200 |
| Seq_2 | 7141 | TCAAGGCAGCTAGTCTGGCTCTGCAAGGGGCCAGGCAGGGT CACACC ACTCTCTGTCTG   | 7200 |
| Seq_1 | 7201 | aggtcagcattggagacagaaatcgggtagggctgcagaggcccatgggtgtgtgcacac    | 7260 |
| Seq_2 | 7201 | AGGTCAGCATTGGAGACAGAAATCGGGT GAGGCTGCAGAGGCCCATGGGTGTGTGCACAC   | 7260 |
| Seq_1 | 7261 | gcctaatacatccagtcttgggtctctgcagggtgggccattgaaattgctgggctccc     | 7320 |
| Seq_2 | 7261 | GCCTAATGATCCAGTCTTGGTCTCTGCAGGGCTGGGCCATTGAAATTGCTGGGCTCCC      | 7320 |
| Seq_1 | 7321 | agagttctgccttgattactgtagcttgcctgcctgccttccttcttcttcttcttctt     | 7380 |
| Seq_2 | 7321 | AGAGTTCTGCCTTGATTACTGTAGCTTGCTGCCTGCCTTCCTTCTTCTTCTTCTTCTT      | 7380 |
| Seq_1 | 7381 | ccttccttcccttcccttcccttcccttcccttcccttcttcttcttcttcttcttcttctt  | 7440 |
| Seq_2 | 7381 | CCTTCTTCTTCTTCTTCTTCTTCTTCTTCTTCTTCTTCTTCTTCTTCTTCTTCTTCTTCTT   | 7440 |
| Seq_1 | 7441 | cactggctcagagcagtcacagagatggaaggagggtaaagaggatgggaagtggaaaag    | 7500 |
| Seq_2 | 7441 | CACTGGCTCAGAGCAGTCAACAGAGATGGAAGGAGGGTAAAGAGGATGGGAAGTGGAAAAG   | 7500 |
| Seq_1 | 7501 | ggagtggggggtggggaatcagcaggctctatagtggttcaagagtttggggtatatctag   | 7560 |
| Seq_2 | 7501 | GGAGTGGGGGTGGGGAATCAGCAGGTCTATAGTGGTTC AAGAGTTTGGGGTATATCTAG    | 7560 |
| Seq_1 | 7561 | tgagaaagtgggaaagtggtgggaggaggaggaggaggaggagagagacacacacacac     | 7620 |
| Seq_2 | 7561 | TGAGAAAGTGGGAAAGTGGTGGGAGGAGGGAGGGAGGGAGGAGAGGACACACACACAC      | 7620 |





|       |      |                                                                  |      |
|-------|------|------------------------------------------------------------------|------|
| Seq_1 | 8521 | tccctggatcctggcaagggttccggagggtttctccctatggctggccgcgaatgggag     | 8580 |
| Seq_2 | 8521 | TCCCTGGATCCTGGCAAGGGTTCCGGAGGGTTTCTCCCTATGGCTGGCCGCGAATGGGAG     | 8580 |
| Seq_1 | 8581 | agcgtatgtggggctccagccctgttttctttggtatgagaagatcatgggggatccca      | 8640 |
| Seq_2 | 8581 | AGCGTATGTGGGGCTCCAGCCCTGTTTTCTTTGTTATGAGAAGATCATGGGGGATCCCA      | 8640 |
| Seq_1 | 8641 | tggcagttttccccaagctcctaaggccagaggaagaagaattgggcctcagaaacgat      | 8700 |
| Seq_2 | 8641 | TGGCAGTTTTCCCAAGCTCCTAAGGCCAGAGGAAGAAGAATTGGGCCTCAGAAACGAT       | 8700 |
| Seq_1 | 8701 | ctgtggcgggttaggtctcaggccgcttcaaacaggctggtatgcaggcttctttgcct      | 8760 |
| Seq_2 | 8701 | CTGTGGCGGTTTAGGTCTCAGGCCGCTTCAAACAGGCTGGTATGCAGGCTTCTTTGCCT      | 8760 |
| Seq_1 | 8761 | aagaagctgctaaaactgtggaagccatctcttacttgaggtctgctggtgttttgagg      | 8820 |
| Seq_2 | 8761 | AAGAAGCTGCTAAAACGTGGAAGCCATCTCTTACTTGAGGTCTGCTGGTGTTTGAGG        | 8820 |
| Seq_1 | 8821 | tagaggcagtggtagaaatcctcccttgaggaagggggtgaactaagaatttcaactgc      | 8880 |
| Seq_2 | 8821 | TAGAGGCAGTGGTAGAAATCCTCCCTTGAGGAAGGGGTTGAACTAAGAATTTCAACTGC      | 8880 |
| Seq_1 | 8881 | ttgcttcatcttcttctggtgaacactcggggctgcctaccaatgtacctcctcccta       | 8940 |
| Seq_2 | 8881 | TTGCTTCATCTTCTTCTGTTGAACACTCGGGGCTGCCCTACCAATGTACCTCCTCCCTA      | 8940 |
| Seq_1 | 8941 | gcagtccactgaatgtctgcagcccagaatttatctgggactgatttaggctgtccgac      | 9000 |
| Seq_2 | 8941 | GCAGTCCACTGAATGTCTGCAGCCCAGAATTTATCTGGGACTGATTTTAGGCTGTCCGAC     | 9000 |
| Seq_1 | 9001 | tgggagccaggctggcagtttgagttagccagccccgttgaagctcaagacattccctt      | 9060 |
| Seq_2 | 9001 | TGGGAGCCAGGCTGGCAGTTTGAGTTAGCCAGCCCCGTTGAAGCTCAAAGACATTCCCTT     | 9060 |
| Seq_1 | 9061 | tagcttgattactccacgaaaacgcctgcaccaccgccccccccactctcccag           | 9120 |
| Seq_2 | 9061 | TAGCTTGATTACTCCACGAAAACGCCTGCACCACCGCCCCCCCCACTCTCCCGCAG         | 9120 |
| Seq_1 | 9121 | ccagccgatctgaaaagatccgtgagggtagacagccccgccaccggcagtgagagtcag     | 9180 |
| Seq_2 | 9121 | CCAGCCGATCTGAAAAGATCCGTGAGGGTACAGCCCCGCCACCGCAGTGAGAGTCAG        | 9180 |
| Seq_1 | 9181 | ccaccgagttgtaggcccctctctgatttgatctacctccagctctccctggctacttt      | 9240 |
| Seq_2 | 9181 | CCACCAGTTGTAGGCCCTCTCTGATTTGGATCTACCTCCAGCTCTCCCTGGCTACTTT       | 9240 |
| Seq_1 | 9241 | atattttattttattttattttattttattttattttattttattttccattggtattgctt   | 9300 |
| Seq_2 | 9241 | ATTTATTTATTTATTTATTTATTTATTTATTTATTTATTTATTTATTTTCCATTGGTATTGCTT | 9300 |
| Seq_1 | 9301 | aggcttgggagaggtggttcatthtaaatgcctgtaacagatgatgagagggttattat      | 9360 |
| Seq_2 | 9301 | AGGCTTGGGAGAGGCTGTTTCATTTAATGCCTGTAACAGATGATGAGAGGGTTATTAT       | 9360 |
| Seq_1 | 9361 | cctctatcctccgggtatatactctttctcccctgttttttatttttgaagacgcggtt      | 9420 |
| Seq_2 | 9361 | CCTCTATCCTCCGGGTATATCTCTTTCTCCCCTGTTTTTATTTTGAAGACGCGGTT         | 9420 |
| Seq_1 | 9421 | attctgggccttttctctattgtagaaaaataacgtctcttaggaggtttcatttttaa      | 9480 |
| Seq_2 | 9421 | ATTCTGGGCCTTTTCTCTATTGTAGAAAAATAACGTCTCTTAGGAGGTTTCATTTTTAA      | 9480 |

|       |       |                                                               |       |
|-------|-------|---------------------------------------------------------------|-------|
| Seq_1 | 9481  | aaattgctggcatggtctcttggatttgacaaagaccatttctcaaaggggcacaaggtt  | 9540  |
| Seq_2 | 9481  | AAATTGCTGGCATGGTCTCTTGGATTTGACAAAGACCATTCTCAAAGGGGCACAAGGTT   | 9540  |
| Seq_1 | 9541  | tttgtttctgttttgtttgggtttctaccgatggcttccaaaaataccgacgcctta     | 9600  |
| Seq_2 | 9541  | TTTGTTTTCTGTTTTGTTTTGGGTTTCTACCCGATGGCTTCCAAAAATACCGACGCCTTA  | 9600  |
| Seq_1 | 9601  | tctttattggctcttccaggagttcagacaaatttgacggacagctctcttatcaccag   | 9660  |
| Seq_2 | 9601  | TCTTTATTGGCTCTTCCAGGAGTTCAGACAAATTTGACGGACAGCTCTCTTATCACCAG   | 9660  |
| Seq_1 | 9661  | agcctgtgcaggggagatgtgggggaccttccgcctcctcctgtctgaagcgggtctt    | 9720  |
| Seq_2 | 9661  | AGCCTGTGCAGGGGAGATGTGGGGGACCTTGCCGCCTCCTCCTGTCTGAAGCGGGTCTT   | 9720  |
| Seq_1 | 9721  | tcgcaagcgggtggtgctggtcggaagtataacaataaaaaagactttctgaagcctc    | 9780  |
| Seq_2 | 9721  | TCGCAAGCGGTGGTGCCTGGTGGTGGAAAGTATAACAATAAAAAAGACTTTCTGAAGCCTC | 9780  |
| Seq_1 | 9781  | cttcagcttggagtgaaggggtcaaacagcttgtcccctatgtcgctagacactctccaac | 9840  |
| Seq_2 | 9781  | CTTCAGCTTGGAGTGAAGGGTCAAACAGCTTGTCCCCTATGTCGCTAGACACTCTCCAAC  | 9840  |
| Seq_1 | 9841  | tccctctcttgcctcagaatagaaacctcgcgcgggcacaggaaccctgcgaccatgg    | 9900  |
| Seq_2 | 9841  | TCCCTCTCTTGTCTCAGAAATAGAACTCGCGCGGGCACAGGAACCCCTGCGCACCATGG   | 9900  |
| Seq_1 | 9901  | ccgatacagatgagggtcttggcctggcgcgacgcctctggagcctgattccaaagaca   | 9960  |
| Seq_2 | 9901  | CCGATACAGATGAGGGCTTTGGCCTGGCGCGCACGCCTCTGGAGCCTGATTCCAAAGACA  | 9960  |
| Seq_1 | 9961  | ggtcttgcgattcgaaacctgagagtgtcttgggggtcccagcaagtctccatcatccc   | 10020 |
| Seq_2 | 9961  | GGTCTTGCGATTTCGAAACCTGAGAGTGCTCTGGGGGTCCCAGCAAGTCTCCATCATCCC  | 10020 |
| Seq_1 | 10021 | cgagcgtgccttaccagcaggttaagaaaagccggcccagcggcaggcgtagaccgag    | 10080 |
| Seq_2 | 10021 | CGCAGCTGCCTTACCCAGCAGGTAAGAAAAGCCGCCAGCGGCAGGCGTAGACCAGAG     | 10080 |
| Seq_1 | 10081 | gactgagcccagctctctgtaaacggtgcaggggggtgggcagggccagctattcctct   | 10140 |
| Seq_2 | 10081 | GACTGAGCCCAGCTCTCTGTAACGGTGCAGGGGGTGGGCAGGGCCAGCTATTCCCTCT    | 10140 |
| Seq_1 | 10141 | atctcctggctagtctcaccaaatctcccccaattccactctatcccaatccactttatc  | 10200 |
| Seq_2 | 10141 | ATTCCTGGCTAGTCTACCAAATCTCCCCAATTCACACTCTATCCCAATCCACTTTATC    | 10200 |
| Seq_1 | 10201 | gagcgtttatctttatggcctgctattttagaaacctatttadattattggagagctc    | 10260 |
| Seq_2 | 10201 | GAGCGTTTTATCTTTATGGCCTGCGTATTTTAGAAACCTATT-----               | 10242 |
| Seq_1 | 10261 | tcaattatccgactatttggggtcagctaacaacgggccagataattctctcccagctgc  | 10320 |
| Seq_2 | 10243 | -----                                                         | 10242 |
| Seq_1 | 10321 | cctgggtatgccttattaagggtcgggtcagcggccgcttcaggccggcatgagcgtga   | 10380 |
| Seq_2 | 10243 | -----                                                         | 10242 |
| Seq_1 | 10381 | cttgaccctccttagatctttcttagccttcgctcggctcgcctgctctgcgaacccg    | 10440 |
| Seq_2 | 10243 | -----                                                         | 10242 |

→ m5-5#3

→ intron2

MscI (a)

MscI (b)

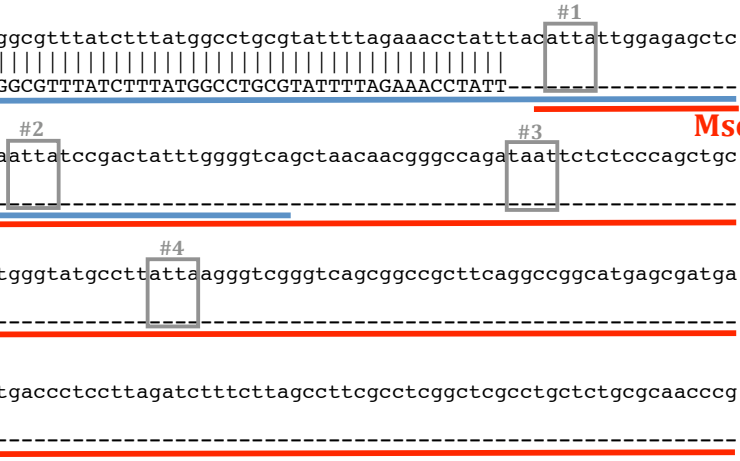

|       |       |                                                                |       |
|-------|-------|----------------------------------------------------------------|-------|
| Seq_1 | 10441 | cctcgcccctcatcacagtaccatttatcttctgctccgggctgaggagctccctgacc    | 10500 |
| Seq_2 | 10243 | -----                                                          | 10242 |
| Seq_1 | 10501 | gccgaggagagcacacaggggctggaaccaaggcaccagagcccggctgactggaagt     | 10560 |
| Seq_2 | 10243 | -----                                                          | 10242 |
| Seq_1 | 10561 | ggtccgagtgaggaggaggtcttctggtctgttatttgagtgccatcgtttttggg       | 10620 |
| Seq_2 | 10243 | -----GCCATCGTTTTTGGG                                           | 10259 |
| Seq_1 | 10621 | ggcgctaagtaggtttaaaactaggtgtcactggaaggcttgaccagagagatgagttt    | 10680 |
| Seq_2 | 10260 | GGCGCTAAGTAGGTTTAAAAC TAGGTGTCACTGGGAAGGCTTGACCAGAGAGATGAGTTT  | 10319 |
| Seq_1 | 10681 | gatctagaaatcttgtccaattgatgtgtatagcttttaataaaagcaaagaggctta     | 10740 |
| Seq_2 | 10320 | GATCTAGAAATCTTGTC CAATTGATGTGTATAGCTTTAATAAAAAGCAAAGAGGCTTA    | 10379 |
| Seq_1 | 10741 | agaatagtttgggaaattacataacattttggaaaggaaaacaagttcactttttag      | 10800 |
| Seq_2 | 10380 | AGAATAGTTTGGGAAATTTACATAACATTTGAAAAGGAAAACAAGTTCAC'TTTT TAG    | 10439 |
| Seq_1 | 10801 | tcggtggtgataaattgtttcacaatgaagagtagtctgactgttttggtattggttt     | 10860 |
| Seq_2 | 10440 | TCGGTGGTTGATAATTGTTTCACAATGAAGAGTAGTCTGACTGTTTTGGTATTGGTTT     | 10499 |
| Seq_1 | 10861 | ttagaaataaacttccagtggaagagaaaatgttaaaaggcttaattggtgcccgaagt    | 10920 |
| Seq_2 | 10500 | TTAGAAATAA'CTCCAGTGGAAAGAGAAAATGT'AAAAGGCTTAATTGGTTGCCCAAGT    | 10559 |
| Seq_1 | 10921 | caaagaaaaggctggcggtggtgctagataaggcaagagctctgaaagattgtaataata   | 10980 |
| Seq_2 | 10560 | CAAAGAAAAGGCTGGCGGTGGTCTAGATAAGGCAAGAGCTCGAAAGATTGTTAATATA     | 10619 |
| Seq_1 | 10981 | gacactgagggggaaaactacttttttggtccttgagaagaaaaacgattttaaaattg    | 11040 |
| Seq_2 | 10620 | GACTGAGGGGGAAAAC TACTTTTTTGGTCC'TGAGAAGAAAACGATTTTAAAATTG      | 10679 |
| Seq_1 | 11041 | aaaatttctacatagtggtcaccatgtgttgaatccttagcacttaggaggggtgaggcag  | 11100 |
| Seq_2 | 10680 | AAAATTTCTACATAGTGGCTCACATGTGT'GGAATCTTAGCACTTAGGAGGGTGAGGCAG   | 10739 |
| Seq_1 | 11101 | gagggttgccaaagagtttgagaccacttttatgcgctgcatagtgaaattccaggcctgtc | 11160 |
| Seq_2 | 10740 | GAGGGTTGCCAAGAGTTTGAGACC ACTTTATGCGCTGCATAGTGAATTCAGGCCTGTC    | 10799 |
| Seq_1 | 11161 | tgggctgcagagcaagactttgtctccaatattaataacaacaataatattgaaaatttt   | 11220 |
| Seq_2 | 10800 | TGGGCTGCAGAGCAAGACTTTGTCTCCAATATTAATAACAACAATAATATTGAAAATTTT   | 10859 |
| Seq_1 | 11221 | tgtatgttcatattagaccagtgatgacggacagcgatgtatttgcatagctgtgtgt     | 11280 |
| Seq_2 | 10860 | TGTATGTT'CATATTTAGACCCAGTGATGACGGACAGCGATGTATTTGCATAGCTGTGTGT  | 10919 |
| Seq_1 | 11281 | tttgcactggttgacaatacaaaaatacctagtggttttctagatggatcccctcc       | 11340 |
| Seq_2 | 10920 | TTTGCATCTGGGTGACAATACAAAATACTTAGTGGGTTTTCTAGATGGATCCCCTCC      | 10979 |

#5

intron2 MscI

#6

intron2 MfeI
